# Supplementary material for: Sophoricoside ameliorates cardiac hypertrophy by activating AMPK/mTORC1-mediated autophagy
Source: Oxford University Press journal article supplement (doi:10.1042/bsr20200661), 2020-09-23
Supplement: bsr-2020-0661_supp.pdf [file bsr-2020-0661_supp.pdf]

**FigureS1**

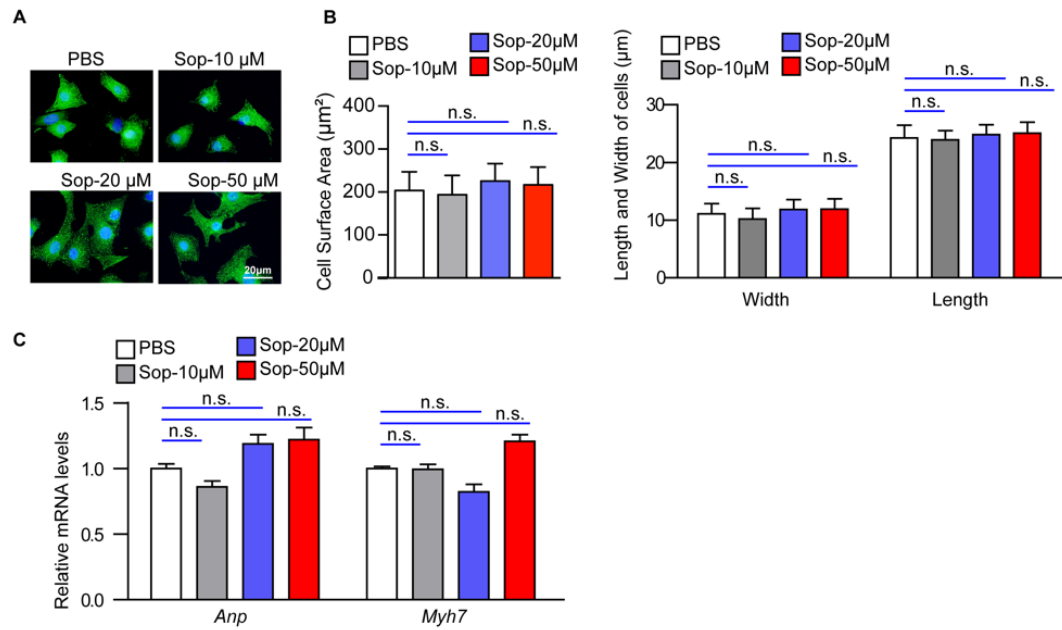

**Supplementary Fig S1. The effect of Sop in different concentrations on cardiac hypertrophy in NRCMs *in vitro*.** (A) Representative images of  $\alpha$ -actinin (green) and DAPI (blue) stained NRCMs that were treated by Sop or PBS for 48 h. Scale bar, 20  $\mu$ m. (B) Statistical quantification of surface area as well as the length and width of NRCMs in the indicated groups.  $n > 50$  cells per group. (C) mRNA levels of hypertrophic marker genes (*Anp*, *Myh7*) in NRCMs in the indicated groups. n.s., no significance,  $P > 0.05$ .

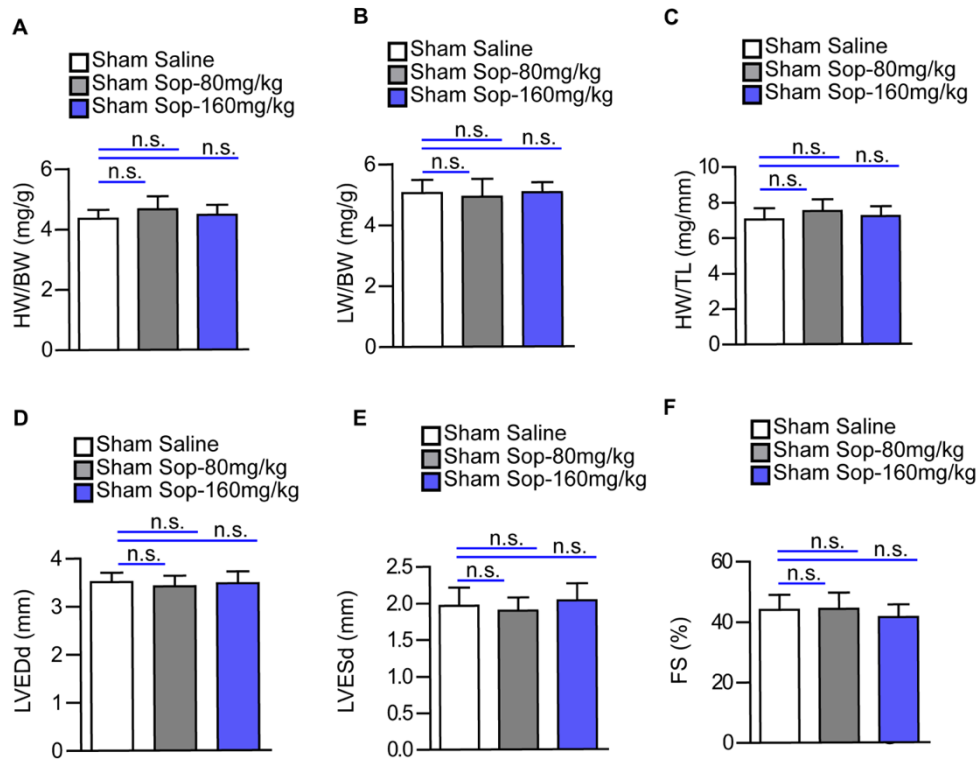

**Supplementary Fig S2. The effect of Sop in different concentrations and cardiac function in mice *in vivo*.** (A-C) Comparison of the (A) heart weight to body weight (HW/BW), (B) Lung weight to body weight (LW/BW) and (C) Heart weight to tibia length (HW/TL) ratios of mice in different groups after sham surgery.  $n=10$  mice for per group. (D-F) Echocardiography results for the measurement of myocardial function (LVEDd, LVESd and FS) in the indicated groups.  $n=10$  mice for per group. n.s., no significance,  $P > 0.05$ .

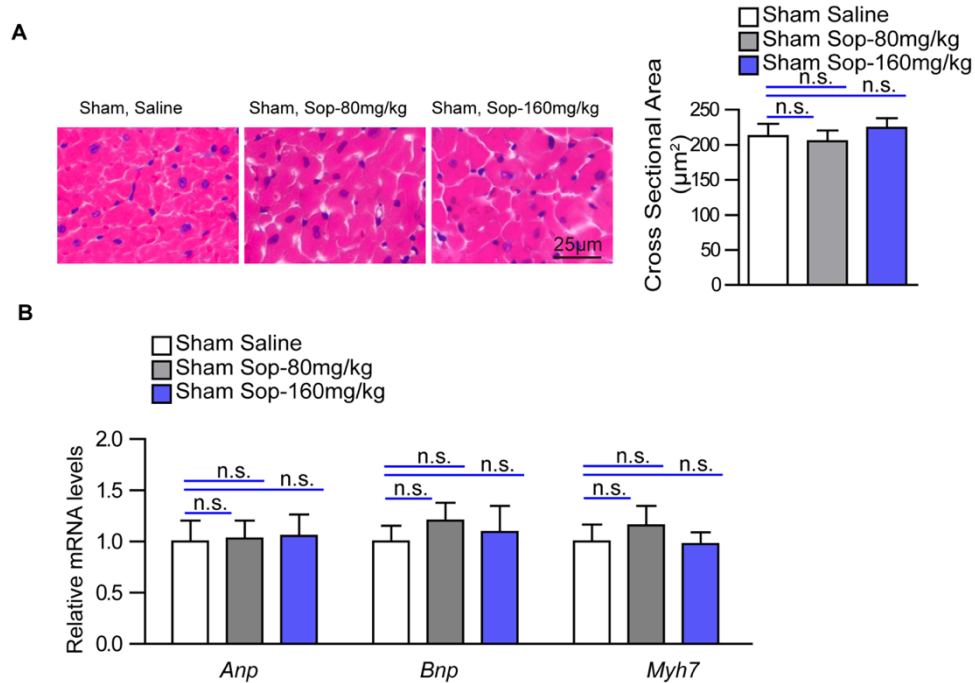

**Supplementary Fig S3. The effect of Sop in different concentrations on cardiac hypertrophy in mice *in vivo*.** (A) Representative heart sections with H&E staining (scale bar, 25 μm) and quantification of the CSA of cardiomyocytes from the indicated groups.  $n=6$  mice for per group. (B) mRNA levels of hypertrophic marker genes (*Anp*, *Bnp*, *Myh7*).  $n=4$  mice for per group. n.s., no significance,  $P > 0.05$ .

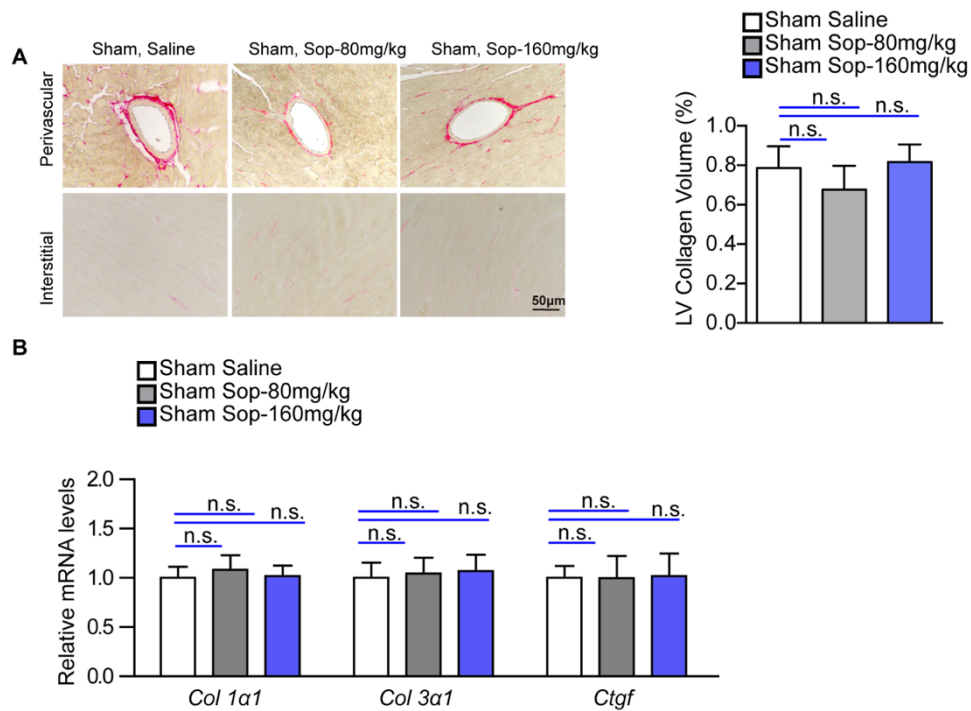

**Supplementary Fig S4. The effect of Sop in different concentrations on cardiac fibrosis in mice *in vivo*.** (A) Histological analysis of hearts sections with PSR staining (scale bar, 50 µm) and the quantification of the LV-collagen volume in the indicated groups.  $n=6$  mice for per group. (B) mRNA levels of fibrotic marker genes (*colla1*, *col3a1*, *ctgf*) in the indicated groups.  $n=4$  mice for per group. n.s., no significance,  $P > 0.05$ .

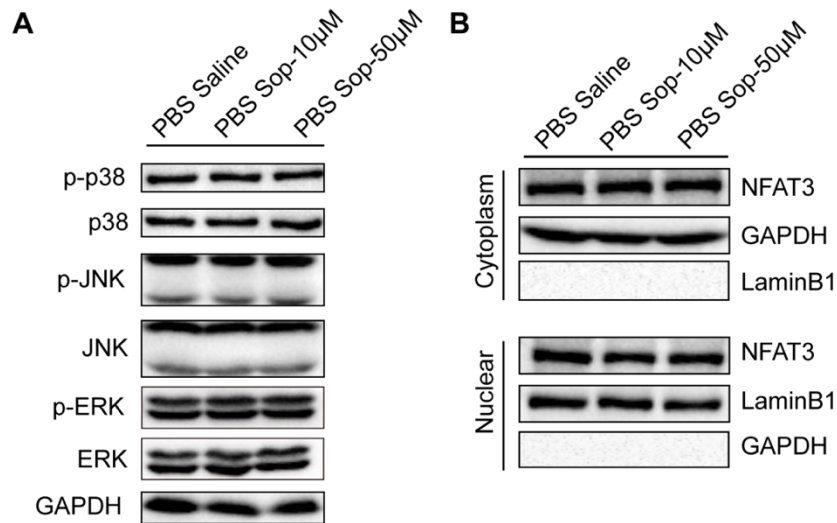

**Supplementary Fig S5. The effect of Sop in different concentrations on PE signal pathway in NRCMs *in vitro*.** (A) Protein levels of the phosphorylation levels of (p38, JNK, ERK) and NFAT3 in NRCMs that were treated by Sop or Saline treatment for 48 h at baseline. GAPDH was used as the loading control. (B) The protein level of NFAT3 in cytoplasm and nuclear of NRCMs treated with saline or Sop for 48 h at baseline.

**Figure S6**

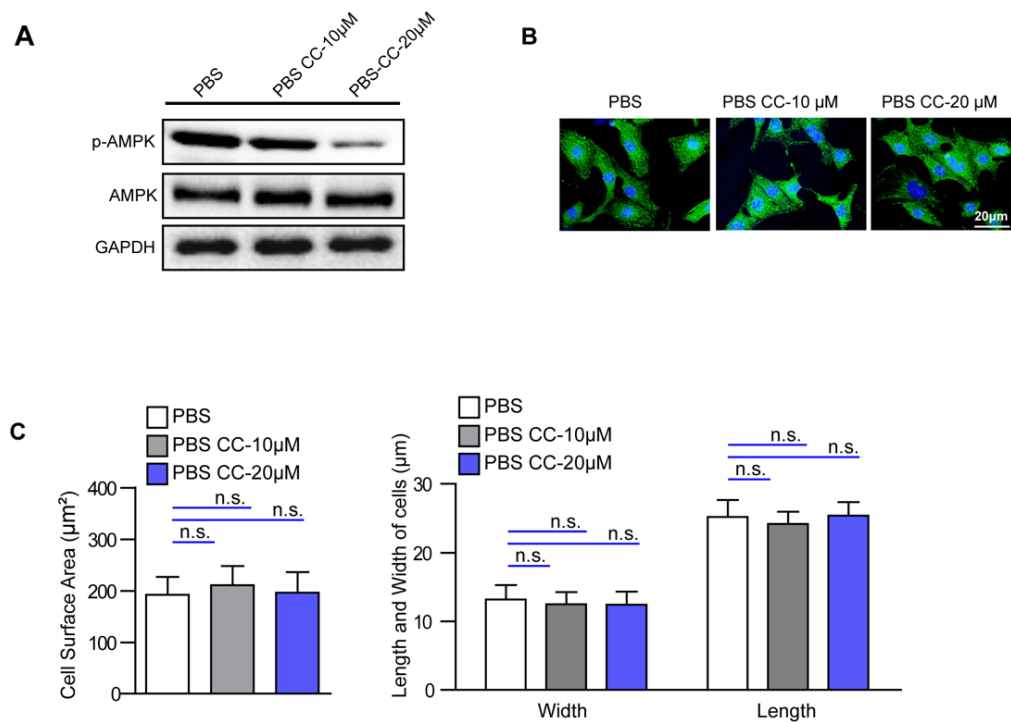

**Supplementary Fig S6. The effect of compound C in different concentrations on cardiac hypertrophy in NRCMs *in vitro*.** (A) Protein levels and statistical quantification of the phosphorylation of AMPK in the NRCMs treated with compound C or saline treatment for 48 h. (B) Representative images of  $\alpha$ -actinin (green) and DAPI (blue) stained NRCMs with PBS treatment in the presence or absence of compound C for 48 h. scale bar, 20  $\mu$ m. (C) Statistical quantification of the cell surface area and length and width of NRCMs in the indicated groups.  $n > 50$  cells per group. n.s., no significance,  $P > 0.05$ .

**Western blots for Fig.1E**

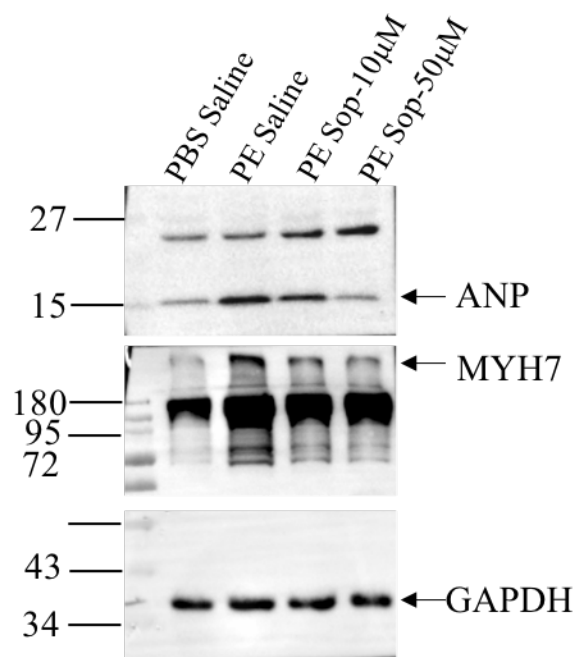

**Supplementary Fig S7.** Original uncropped gels of representative Western blot images relating to indicated Figures

**Western blots for Fig.3G**

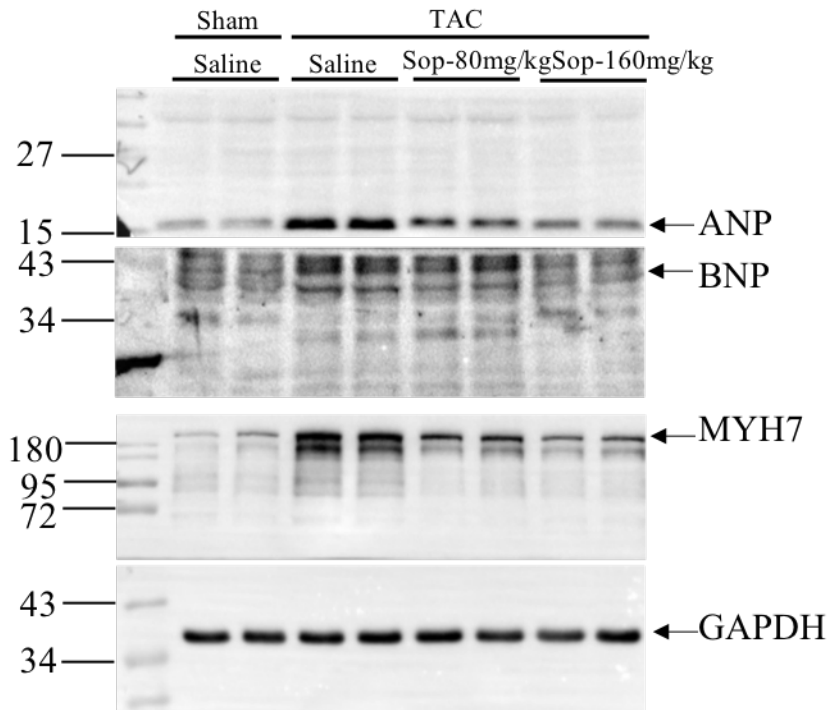

**Supplementary Fig S7.** Original uncropped gels of representative Western blot images relating to indicated Figures

**Western blots for Fig.4F**

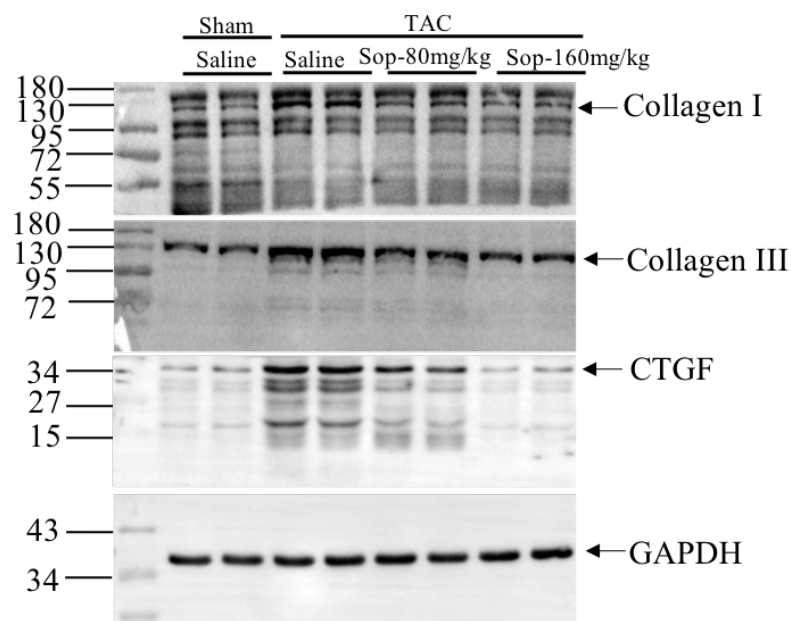

**Supplementary Fig S7.** Original uncropped gels of representative Western blot images relating to indicated Figures

**Western blots for Fig.5A**

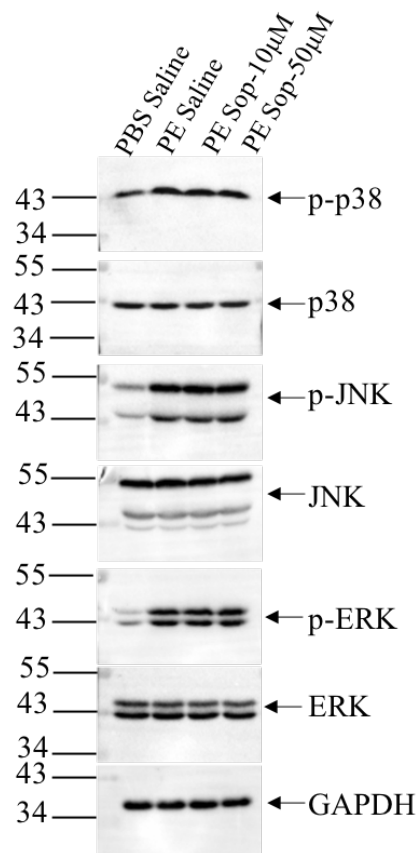

**Supplementary Fig S7.** Original uncropped gels of representative Western blot images relating to indicated Figures

**Western blots for Fig.5B**

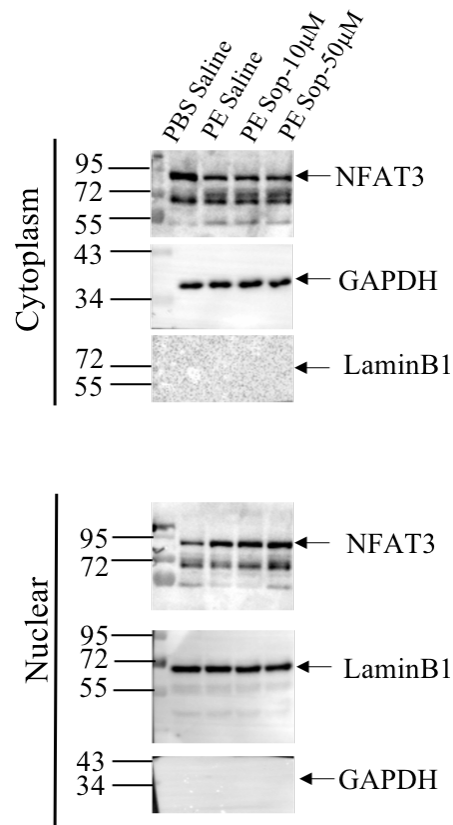

**Supplementary Fig S7.** Original uncropped gels of representative Western blot images relating to indicated Figures

**Western blots for Fig.5C**

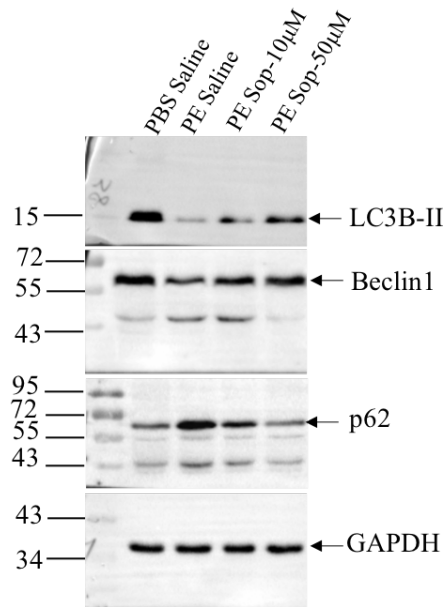

**Supplementary Fig S7.** Original uncropped gels of representative Western blot images relating to indicated Figures

**Western blots for Fig.5E**

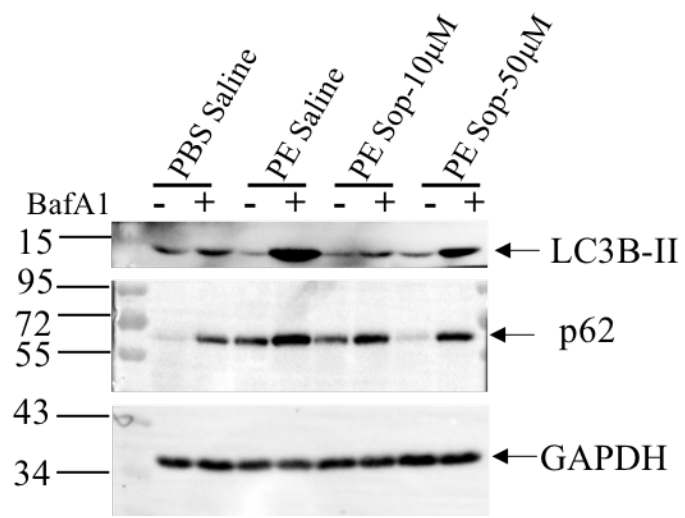

**Supplementary Fig S7.** Original uncropped gels of representative Western blot images relating to indicated Figure

**Western blots for Fig.5F**

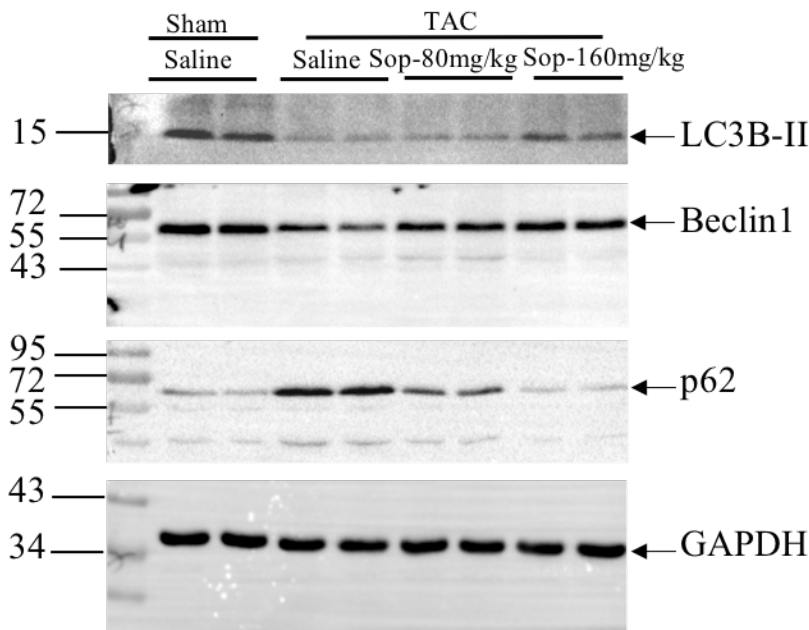

**Supplementary Fig S7.** Original uncropped gels of representative Western blot images relating to indicated Figure

**Western blots for Fig.6A**

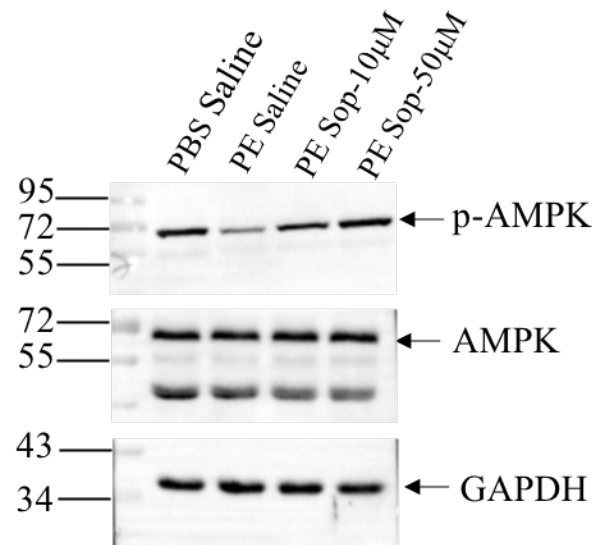

**Supplementary Fig S7.** Original uncropped gels of representative Western blot images relating to indicated Figure

**Western blots for Fig.6B**

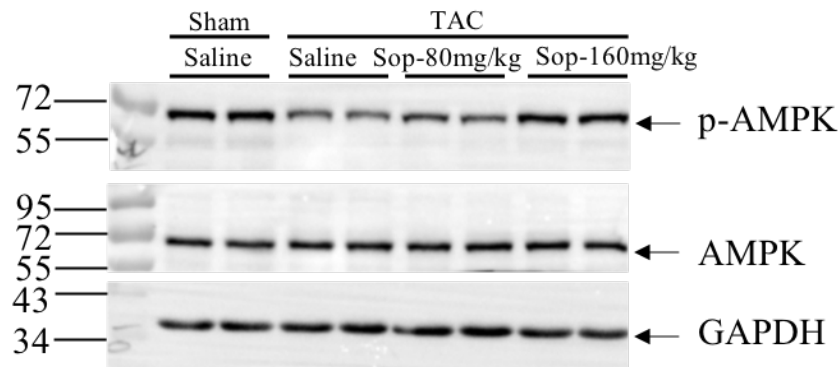

**Supplementary Fig S7.** Original uncropped gels of representative Western blot images relating to indicated Figure

**Western blots for Fig.6C**

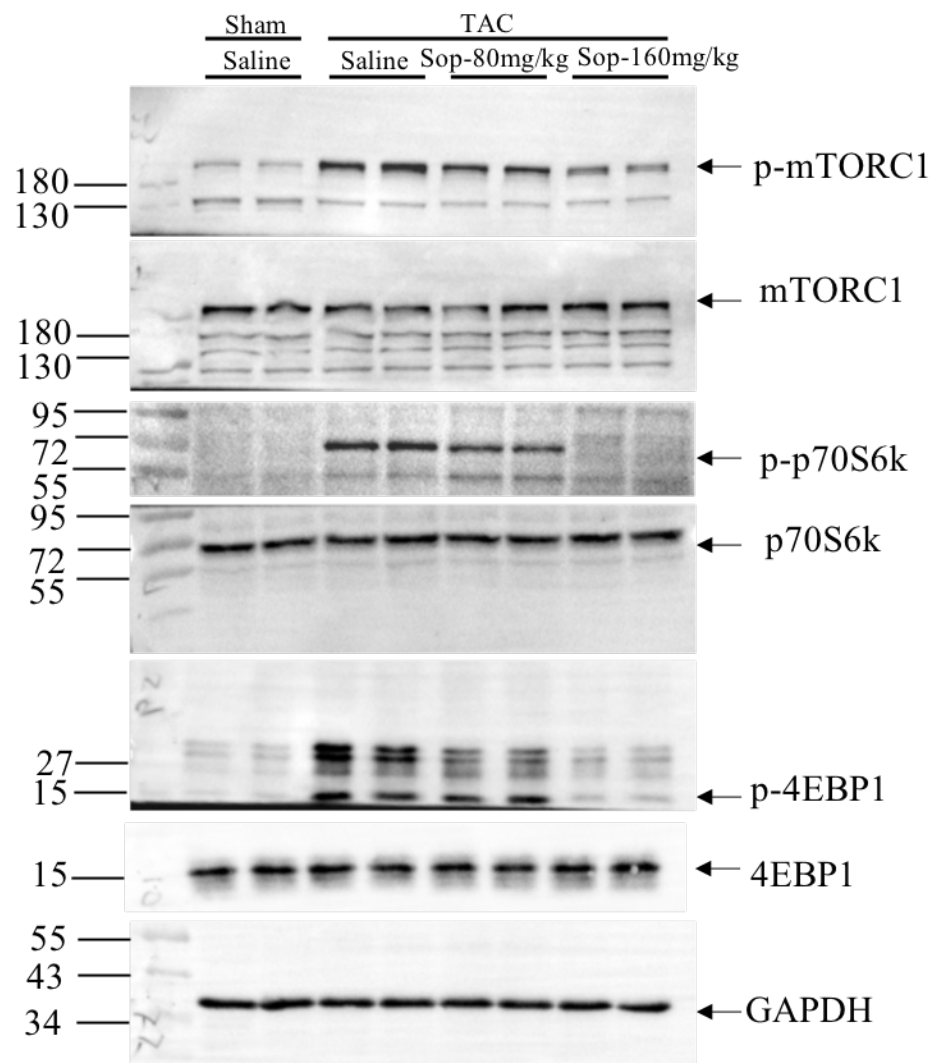

**Supplementary Fig S7.** Original uncropped gels of representative Western blot images relating to indicated Figure

**Western blots for Fig.7A**

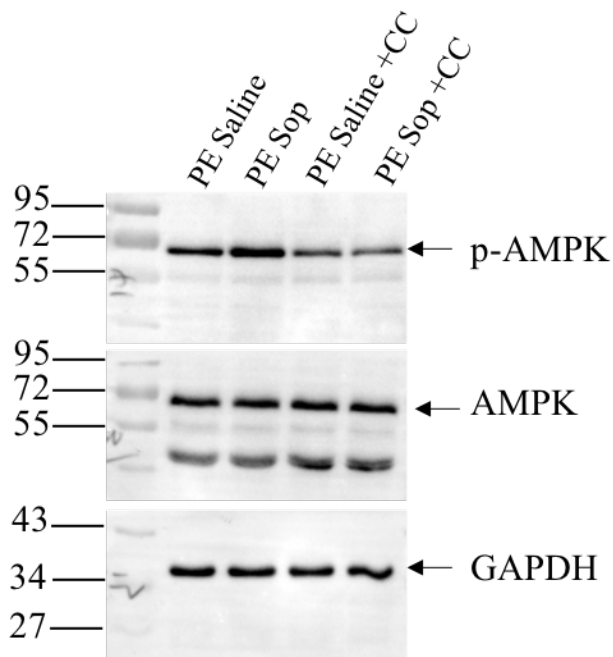

**Supplementary Fig S7.** Original uncropped gels of representative Western blot images relating to indicated Figures

**Western blots for Fig.7B**

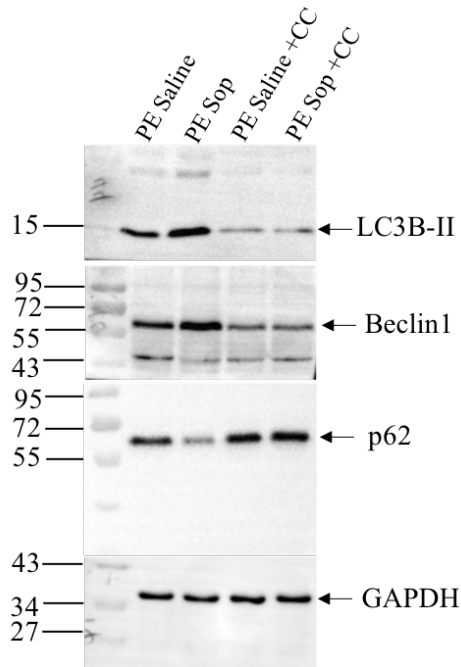

**Supplementary Fig S7.** Original uncropped gels of representative Western blot images relating to indicated Figure

Western blots for Fig.S5A

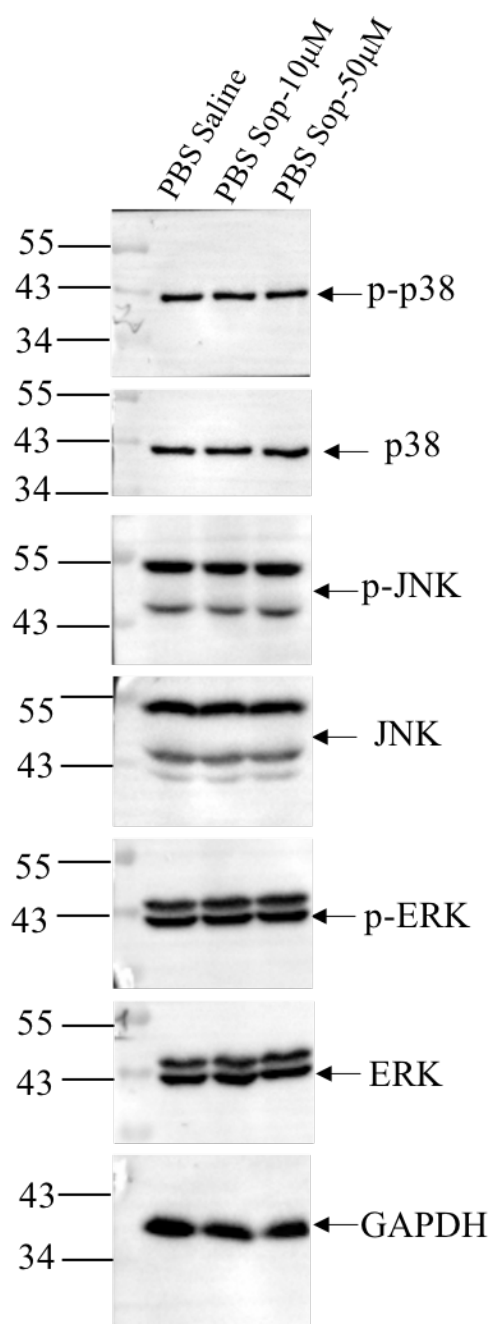

**Supplementary Fig S7.** Original uncropped gels of representative Western blot images relating to indicated Figures

**Western blots for Fig.S5B**

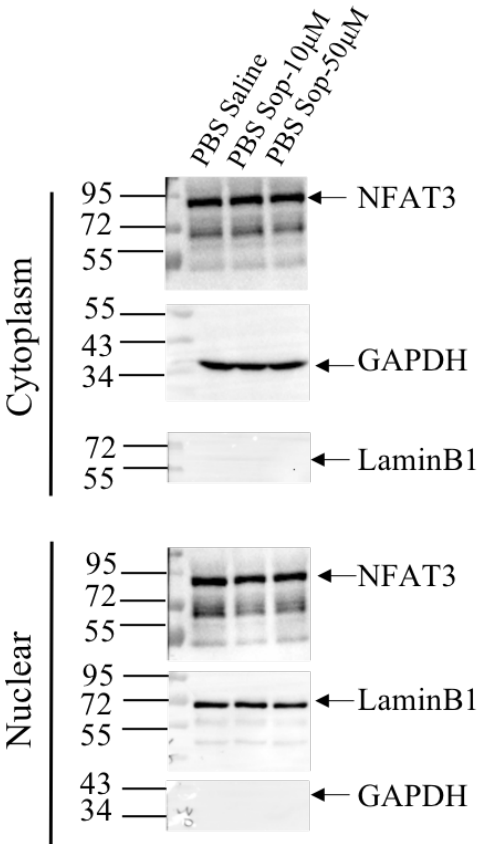

**Supplementary Fig S7.** Original uncropped gels of representative Western blot images relating to indicated Figures

**Western blots for Fig.S6A**

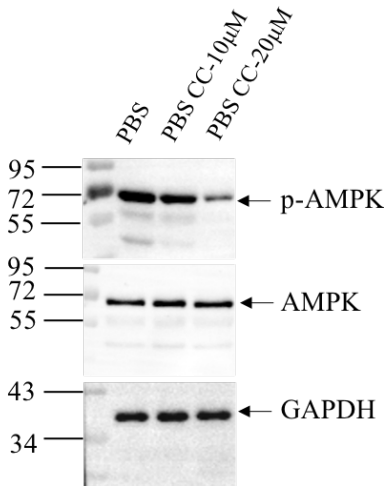

**Supplementary Fig S7.** Original uncropped gels of representative Western blot images relating to indicated Figures

**Supplementary Table 1 The information of antibodies used in Western blotting**

| Antibody     | Manufacturer              | Catalogue number | Dilution ratio |
|--------------|---------------------------|------------------|----------------|
| ANP          | ABclonal                  | A1609            | 1:1000         |
| BNP          | Santa Cruz Biotechnology  | sc-271185        | 1:200          |
| MYH7         | Santa Cruz Biotechnology  | sc-53090         | 1:200          |
| Collagen I   | Santa Cruz Biotechnology  | sc-293182        | 1:1000         |
| Collagen III | Santa Cruz Biotechnology  | sc-271249        | 1:1000         |
| CTGF         | Santa Cruz Biotechnology  | sc-14939         | 1:200          |
| LC3B-II      | Cell signaling Technology | 3868             | 1:1000         |
| p62          | Cell signaling Technology | 5114             | 1:1000         |
| Beclin1      | Cell signaling Technology | 3495             | 1:1000         |
| p-AMPK       | Cell signaling Technology | 2535             | 1:1000         |
| AMPK         | Cell signaling Technology | 2603             | 1:1000         |
| p-4EBP1      | Cell signaling Technology | 2855             | 1:1000         |
| 4EBP1        | Cell signaling Technology | 9644             | 1:1000         |
| p-p70S6k     | Cell signaling Technology | 9208             | 1:1000         |
| p70S6k       | Cell signaling Technology | 2708             | 1:1000         |
| p-ERK        | Cell signaling Technology | 4370             | 1:1000         |
| ERK          | Cell signaling Technology | 4695             | 1:1000         |
| p-JNK        | Cell signaling Technology | 4668             | 1:1000         |
| JNK          | Cell signaling Technology | 9252             | 1:1000         |
| p-p38        | Cell signaling Technology | 4511             | 1:1000         |
| p38          | Cell signaling Technology | 9212             | 1:1000         |
| p-mTORC      | Cell signaling Technology | 2971             | 1:1000         |
| mTORC        | Cell signaling Technology | 2983             | 1:1000         |
| NFAT3        | Sigma                     | SAB4501982       | 1:1000         |
| LaminB1      | ABCAM                     | ab16048          | 1:1000         |
| GAPDH        | Cell signaling Technology | 5174             | 1:1000         |

**Supplementary Table 2 The information of Primers used in Quantitative real-time PCR  
(qRT-PCR)**

| Gene name            | Forward primer (mouse) | Reverse primer (mouse)   |
|----------------------|------------------------|--------------------------|
| <i>Anp</i>           | TCGGAGCCTACGAAGATCCA   | TTCGGTACCGGAAGCTGTTG     |
| <i>Bnp</i>           | GAAGGACCAAGGCCTCACAA   | TTCAGTGCGTTACAGCCCAA     |
| <i>Myh7</i>          | CAACCTGTCCAAGTTCCGCA   | TACTCCTCATTGAGGCCCTTG    |
| <i>Collagen Ia</i>   | TGCTAACGTGGTTCGTGACCGT | ACATCTTGAGGTCGCGGCATGT   |
| <i>Collagen IIIa</i> | ACGTAAGCACTGGTGGACAG   | CCGGCTGGAAAGAAGTCTGA     |
| <i>Ctgf</i>          | TGACCCCTGCGACCCACA     | TACACCGACCCACCGAAGACACAG |
| <i>Gapdh</i>         | ACTCCACTCACGGCAAATTC   | TCTCCATGGTGGTGAAGACA     |

  

| Gene name    | Forward primer (rat)    | Reverse primer (rat)    |
|--------------|-------------------------|-------------------------|
| <i>Anp</i>   | AAAGCAAAGCTGAGGGCTCTGCT | TTCGGTACCGGAAGCTGTTGCA  |
| <i>Myh7</i>  | AGTGAAGAGCCTCCAGAGTTTG  | GTTGATGAGGCTGGTGTCTCTGG |
| <i>Gapdh</i> | TGTGAACGGATTTGGCCCTA    | GATGGTGATGGGTTTCCCGT    |
